# Supplementary material for: Acibenzolar-S-Methyl Reprograms Apple Transcriptome Toward Resistance to Rosy Apple Aphid
Source: Front Plant Sci. 2018 Dec 12;9:1795. doi: 10.3389/fpls.2018.01795 (PMC6299034; doi:10.3389/fpls.2018.01795)
Supplement: Supplementary file 1 [file Table_3.xlsx]

## Sheet: Feuil1
Table S3: Selected genes from microarray data set involved in diverse biological functions
	Gene ID	log2FC ASM/Control	p-values	Gene	Main BP	Main CC
Up-regulated genes	Perception transduction
	MDP0000577544	0.91	0.0115505	FLS2	protein phosphorylation	no
	MDP0000379697	2.44	0.000923497	WAK5	protein phosphorylation	integral component of membrane
	MDP0000195855	2.21	0.000883192	CRK10	protein phosphorylation	membrane
	MDP0000512062	1.08	0.0356221	MAPKKK14	protein phosphorylation	no
	MDP0000220179	0.67	0.0170223	MAPKKK5	protein phosphorylation	no
	MDP0000771629	1.57	0.00753619	CPK6	protein phosphorylation	intrinsic component of membrane
	MDP0000226074	0.53	0.00349278	CIPK5	protein phosphorylation	no
	Transcription factor
	MDP0000381897	0.5	0.0295971	WRKY11	regulation of transcription, DNA-templated	nucleus
	MDP0000151958	1.48	0.0406064	WRKY11	regulation of transcription, DNA-templated	nucleus
	MDP0000272940	1.51	0.00418656	WRKY11	regulation of transcription, DNA-templated	nucleus
	MDP0000185288	1.7	0.0380609	WRKY11	regulation of transcription, DNA-templated	nucleus
	MDP0000269607	2.2	0.00865739	WRKY11	regulation of transcription, DNA-templated	nucleus
	MDP0000811478	1.4	0.00110332	WRKY17	regulation of transcription, DNA-templated	nucleus
	MDP0000507805	1.01	0.00366916	WRKY33	regulation of transcription, DNA-templated	nucleus
	MDP0000195385	1.16	0.0215678	WRKY33	regulation of transcription, DNA-templated	nucleus
	MDP0000296025	1.04	0.0418965	WRKY33	regulation of transcription, DNA-templated	nucleus
	MDP0000708692	1.76	0.00697516	WRKY33	regulation of transcription, DNA-templated	nucleus
	MDP0000202292	0.57	0.00947519	WRKY35	regulation of transcription, DNA-templated	nucleus
	MDP0000228838	3.07	0.0219951	WRKY40	regulation of transcription, DNA-templated	nucleus
	MDP0000228838	3.07	0.0219951	WRKY40	regulation of transcription, DNA-templated	nucleus
	MDP0000689162	1.15	0.0277588	WRKY40	regulation of transcription, DNA-templated	nucleus
	MDP0000307516	1.44	0.00467881	WRKY40	regulation of transcription, DNA-templated	nucleus
	MDP0000263961	3.5	0.0313194	WRKY40	regulation of transcription, DNA-templated	nucleus
	MDP0000263349	3.2	0.000960605	WRKY40	regulation of transcription, DNA-templated	nucleus
	MDP0000299114	0.98	0.0114635	WRKY41	regulation of transcription, DNA-templated	nucleus
	MDP0000318866	1.24	0.00282754	WRKY41	regulation of transcription, DNA-templated	nucleus
	MDP0000157124	1.26	0.00141445	WRKY41	regulation of transcription, DNA-templated	nucleus
	MDP0000146360	1.12	0.00288609	WRKY41	regulation of transcription, DNA-templated	nucleus
	MDP0000121669	2.06	0.00270867	WRKY50	regulation of transcription, DNA-templated	nucleus
	MDP0000253189	3.64	1.23e-06	WRKY51	regulation of transcription, DNA-templated	nucleus
	MDP0000219647	0.7	0.0364932	WRKY53	regulation of transcription, DNA-templated	nucleus
	MDP0000468391	0.57	0.0155802	WRKY53	regulation of transcription, DNA-templated	nucleus
	MDP0000191017	1.49	0.0211113	WRKY53	regulation of transcription, DNA-templated	nucleus
	MDP0000418900	2.22	0.00103858	WRKY60	regulation of transcription, DNA-templated	nucleus
	MDP0000304113	1.32	0.00139995	WRKY65	regulation of transcription, DNA-templated	nucleus
	MDP0000304113	1.32	0.00139995	WRKY65	regulation of transcription, DNA-templated	nucleus
	MDP0000133918	0.68	0.0110071	WRKY65	regulation of transcription, DNA-templated	nucleus
	MDP0000228304	1.67	0.00680264	WRKY70	regulation of transcription, DNA-templated	nucleus
	MDP0000175240	2.43	3.77e-06	WRKY70	regulation of transcription, DNA-templated	nucleus
	PR proteins
	MDP0000395953	5.44	0.000689315	PR1	defense response	extracellular region
	MDP0000711379	2.62	0.000942051	PR1	defense response	extracellular region
	MDP0000327191	3.9	0.00128338	PR2	carbohydrate metabolic process	no
	MDP0000287302	3.34	6.06e-06	PR4	defense response	no
	MDP0000782085	2.77	0.00793026	PR5	chitin catabolic process	no
	MDP0000292031	3.5	2.86e-05	PR5	defense response	no
	MDP0000705226	2.09	0.000336935	PR8	carbohydrate metabolic process	extracellular region
	MDP0000705226	2.09	0.000336935	PR8	carbohydrate metabolic process	extracellular region
	MDP0000310481	1.68	0.0295841	PR8	carbohydrate metabolic process	extracellular region
	MDP0000425030	2.29	0.000494839	PR8	carbohydrate metabolic process	extracellular region
	MDP0000217803	2.42	0.000645352	PR8	carbohydrate metabolic process	extracellular region
	MDP0000222724	2.41	0.000268796	PR8	carbohydrate metabolic process	extracellular region
	MDP0000275926	1.35	0.0459045	PR8	carbohydrate metabolic process	extracellular region
	MDP0000286587	1.88	0.00488116	PR8	carbohydrate metabolic process	extracellular region
	MDP0000218640	1.75	0.0369269	PR8	carbohydrate metabolic process	extracellular region
	MDP0000789304	1.95	0.0190732	PR8	carbohydrate metabolic process	extracellular region
	MDP0000280265	0.93	0.00102194	PR8	carbohydrate metabolic process	extracellular region
	MDP0000888042	1.98	0.0109514	PR8	carbohydrate metabolic process	extracellular region
	MDP0000192511	1.86	0.000499435	PR8	carbohydrate metabolic process	extracellular region
	MDP0000414607	1.84	0.0253149	PR8	carbohydrate metabolic process	extracellular region
	MDP0000940313	1.94	0.000257179	PR8	carbohydrate metabolic process	extracellular region
	MDP0000290970	2.05	0.00566383	PR8	carbohydrate metabolic process	extracellular region
	MDP0000507853	1.8	0.00987329	PR8	carbohydrate metabolic process	extracellular region
	MDP0000218691	1.91	0.0074231	PR8	carbohydrate metabolic process	extracellular region
	MDP0000216662	2.07	0.00520853	PR8	carbohydrate metabolic process	extracellular region
	MDP0000789459	1.28	0.0226572	PR8	carbohydrate metabolic process	extracellular region
	MDP0000940312	1.35	0.0112614	PR8	carbohydrate metabolic process	extracellular region
	MDP0000893848	1.94	0.0264516	PR14	lipid transport	no
	MDP0000940078	2.3	0.00519938	PR14	lipid transport	no
	MDP0000120157	1.68	0.0107454	PR14	lipid transport	no
	MDP0000485268	1.87	0.0148448	PR14	lipid transport	no
	MDP0000940078	2.3	0.00519938	PR14	lipid transport	no
	Terpene Synthase
	MDP0000152278	1.22	0.0350746	TPS	metabolic process	no
	MDP0000182333	1.3	0.0068917	TPS	metabolic process	no
	MDP0000190430	1.88	0.000288353	TPS	metabolic process	no
	MDP0000199152	1.68	0.000147861	TPS	metabolic process	no
	MDP0000203143	1.8	0.0122742	TPS	metabolic process	no
	MDP0000218642	0.7	0.0230181	TPS	metabolic process	no
	MDP0000236236	3.11	0.000208152	TPS	metabolic process	no
	MDP0000265187	1.01	0.0498017	TPS	metabolic process	no
Down-regulated genes	Photosynthesis
	MDP0000831656	-1.01	0.0177197	PORA	chlorophyll biosynthetic process	chloroplast
	MDP0000171795	-0.91	0.0128806	PORA	chlorophyll biosynthetic process	chloroplast
	MDP0000325356	-0.86	0.0454462	PORA	chlorophyll biosynthetic process	chloroplast
	MDP0000451103	-0.5	0.0154329	PSBQ	photosystem II oxygen evolving complex	chloroplast
	MDP0000139097	-1	0.00820174	PORC	chlorophyll biosynthetic process	chloroplast
	MDP0000089079	-0.55	0.0452828	CHLD/PDE166	chlorophyll biosynthetic process	chloroplast
	MDP0000206034	-0.7	0.0463871	CHLM	chlorophyll biosynthetic process	chloroplast
	MDP0000639265	-0.7	0.0101997	CHLI1	chlorophyll biosynthetic process	chloroplast
	MDP0000131537	-0.53	0.0391974	Unknow portein	carbohydrate metabolic process	chloroplast
	Calvin Benson Cycle
	MDP0000178821	-0.56	0.0241661	FBPase	carbohydrate metabolic process	chloroplast
	MDP0000273014	-0.79	0.00444075	FBPase	carbohydrate metabolic process	chloroplast
	MDP0000591370	-0.69	0.0288715	FBPase	carbohydrate metabolic process	chloroplast
	MDP0000178821	-0.56	0.0241661	FBPase	carbohydrate metabolic process	chloroplast
	MDP0000273014	-0.79	0.00444075	FBPase	carbohydrate metabolic process	chloroplast
	MDP0000591370	-0.69	0.0288715	FBPase	carbohydrate metabolic process	chloroplast
	MDP0000136007	-0.71	0.0364258	PRK	carbohydrate metabolic process	chloroplast
	MDP0000267169	-1.07	0.0327417	SBPASE	carbohydrate metabolic process	chloroplast
	Starch
	MDP0000181139	-0.83	0.000193875	PGM	carbohydrate metabolic process	chloroplast
	MDP0000158340	-0.78	0.00184793	PWD	carbohydrate metabolic process	chloroplast
	MDP0000252405	-0.55	0.00507287	SEX1	carbohydrate metabolic process	chloroplast
	MDP0000647541	-0.69	0.0160643	ATISA2	carbohydrate metabolic process	chloroplast
	MDP0000119748	-0.59	0.0188423	ATISA3	carbohydrate metabolic process	chloroplast
	MDP0000178821	-0.56	0.0241661	FBPase	carbohydrate metabolic process	chloroplast
	Translation
	MDP0000127313	-0.88	0.000965929	S1 RNA-binding domain-containing protein	Translation	ribosome
	MDP0000139992	-0.54	0.0454225	ribosomal protein L19 family protein	Translation	ribosome
	MDP0000158530	-0.5	0.00897818	ribosomal protein L17 family protein	Translation	ribosome
	MDP0000158987	-0.76	0.00256503	RPS1	Translation	ribosome
	MDP0000160478	-0.87	0.000314885	ribosomal protein L1 family protein	Translation	ribosome
	MDP0000164974	-0.61	0.00784537	RPS9	Translation	ribosome
	MDP0000174869	-0.54	0.000764947	PSRP-3	Translation	ribosome
	MDP0000186794	-0.61	0.0351121	PRPL11	Translation	ribosome
	MDP0000205210	-0.71	0.00498475	chloroplast 30S ribosomal protein S20, putative	Translation	ribosome
	MDP0000215948	-0.78	0.0320124	EMB1473	Translation	ribosome
	MDP0000236557	-0.56	0.0184708	CL28	Translation	ribosome
	MDP0000300177	-0.55	0.0133958	16S rRNA processing protein RimM family	Translation	ribosome
	MDP0000301056	-0.67	0.027455	RPL27	Translation	ribosome
	MDP0000303386	-0.52	0.0287781	ARP1	Translation	ribosome
	MDP0000321137	-0.85	0.00137324	RPL9	Translation	ribosome
	MDP0000321309	-0.69	0.0074227	ATL5	Translation	ribosome
	MDP0000364447	-0.66	0.0039251	EMB1473	Translation	ribosome
	MDP0000411075	-0.56	0.00710915	chloroplast 30S ribosomal protein S20, putative	Translation	ribosome
	MDP0000434501	-0.52	0.0446117	RPL38B	Translation	ribosome
	MDP0000445632	-0.52	0.02434	ribosomal protein S9 family protein	Translation	ribosome
	MDP0000563776	-0.6	0.0470568	ribosomal protein L29 family protein	Translation	ribosome
	MDP0000574609	-0.57	0.000642034	PSRP-3	Translation	ribosome
	MDP0000637610	-0.51	0.0258872	chloroplast 30S ribosomal protein S20, putative	Translation	ribosome
	MDP0000696172	-1.25	0.0251492	RPL27	Translation	ribosome
	MDP0000706530	-0.59	0.0451354	ribosomal protein L10 family protein, peptidase M1 family protein	Translation	ribosome
	MDP0000736627	-0.58	0.0177536	rhomboid family protein	Translation	ribosome
	MDP0000834632	-0.56	0.0466261	ribosomal protein L18 family protein	Translation	ribosome
	MDP0000847579	-0.51	0.00191981	ribosomal protein L4 family protein	Translation	ribosome
	MDP0000915728	-0.52	0.038738	RPL38B	Translation	ribosome
	MDP0000926379	-0.78	0.00155126	RPS1	Translation	ribosome
	Regulation of transcription
	MDP0000208345	-0.73	0.00190722	SHY2	auxin-activated signaling pathway	nucleus
	MDP0000179650	-0.5	0.000923581	ETT	auxin-activated signaling pathway	nucleus
	MDP0000253285	-0.58	0.0224766	AXR3	auxin-activated signaling pathway	nucleus
	MDP0000225980	-0.5	0.0321776	ARF4	auxin-activated signaling pathway	nucleus
	MDP0000634433	-0.72	0.03985	ARF18	auxin-activated signaling pathway	nucleus
	MDP0000256621	-0.58	0.037564	ARF17	auxin-activated signaling pathway	nucleus
	MDP0000831937	-0.67	0.00296962	SIGE	sigma factor activity	no
	MDP0000934360	-0.95	0.00110678	SIGA	sigma factor activity	no
	MDP0000939377	-0.77	0.0135218	SIGA	sigma factor activity	no
	Cell wall remodelling
	MDP0000504183	-0.58	0.0322569	ATEXPA4	no	Cell Wall
	MDP0000164054	-0.64	0.0412525	ATEXPB1	cell wall organization	Cell Wall
	MDP0000895533	-0.63	0.00317438	BGAL3	carbohydrate metabolic process	extracellular region
	MDP0000899966	-0.69	0.0132805	BGAL3	carbohydrate metabolic process	extracellular region
	MDP0000195063	-0.92	0.0295692	BGAL3	carbohydrate metabolic process	extracellular region
	MDP0000657667	-0.74	0.0491046	BGAL3	carbohydrate metabolic process	extracellular region
	MDP0000657667	-0.74	0.0491046	pectinesterase	cell wall organization	Cell Wall
	MDP0000474161	-0.95	0.00014776	pectinesterase	no	Cell Wall
	MDP0000147368	-0.71	0.00210605	pectinesterase	cell wall organization	extracellular region
	MDP0000378203	-0.56	0.0368888	polygalacturonase	cell wall organization	Cell Wall
	MDP0000378203	-0.56	0.0368888	XTH	no	apoplast
	MDP0000132431	-0.57	0.0209993	XTH	no	apoplast
	MDP0000180043	-0.58	0.00808452	XTH	no	apoplast
	MDP0000201058	-0.5	0.0316659	XTH9	no	Cell Wall
BP: Biological Process
CC: Cellular Compound
no: no GO associated
